# Supplementary material
Source: PubMed Central journal article supplement (PMC3951439)
Supplement: NIHMS545442-supplement-Supplementary_File.pdf [file NIHMS545442-supplement-Supplementary_File.pdf]

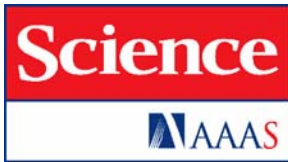

[www.sciencemag.org/cgi/content/full/science.1232245/DC1](http://www.sciencemag.org/cgi/content/full/science.1232245/DC1)

Supplementary Materials for  
**Inhibition of PRC2 Activity by a Gain-of-Function H3 Mutation Found  
in Pediatric Glioblastoma**

Peter W. Lewis, Manuel M. Müller, Matthew S. Koletsy, Francisco Cordero, Shu Lin,  
Laura A. Banaszynski, Benjamin A. Garcia, Tom W. Muir, Oren J. Becher,  
C. David Allis\*

\*To whom correspondence should be addressed. E-mail: [alliscd@rockefeller.edu](mailto:alliscd@rockefeller.edu)

Published 28 March 2013 on *Science Express*  
DOI: 10.1126/science.1232245

**This PDF file includes**

Materials and Methods  
Supplementary Text  
Figs. S1 to S8  
Full References

## **SUPPLEMENTAL INFORMATION**

### **MATERIALS/METHODS**

#### **Transgenic cell line generation**

Human 293T, 293 or murine PDGF-transduced glioblastoma cells were transduced with recombinant, concentrated Lentivirus made with the pCDH-EF1-MCS-Puro or Neo expression vector (5 $\mu$ g / mL polybrene, 2x10<sup>7</sup> IFU). Transduced cells were grown under selection (1 $\mu$ g/mL Puromycin or 0.8 $\mu$ g/mL G418) at 24 hours post transduction for 72 hours. Cells were collected at 7-10 days post transduction for immunoblot analysis. The amino acid sequence of epitope tagged-H3.3 used in transgenic experiments (C-terminal FLAG and HA epitope sequences are bold and underlined):

M A R T K Q T A R K S T G G K A P R K Q L A T K A A R K S A P S T  
G G V K K P H R Y R P G T V A L R E I R R Y Q K S T E L L I R K L  
P F Q R L V R E I A Q D F K T D L R F Q S A A I G A L Q E A S E A  
Y L V G L F E D T N L C A I H A K R V T I M P K D I Q L A R R I R G  
E R A A A A G G **D Y K D D D D K S A A G G Y P Y D V P D Y A**

#### **RCAS modeling of murine glioblastomas**

To generate murine brainstem gliomas with and without the H3.3K27M mutation, we injected 1  $\mu$ L (1x10<sup>5</sup> cells) of RCAS-PDGF-B, RCAS-Cre,  $\pm$  RCAS-H3.3K27M expressing DF1 cells intracranially into nestin tv-a; p53 floxed neonatal mice. Mice were monitored carefully for signs of tumor development (hydrocephalus, lethargy, head tilt). On the appearance of brain tumor symptoms (or at 12 weeks if mice did not develop symptoms), mice were euthanized with CO<sub>2</sub>, brain tissue was extracted, fixed in formalin, and paraffin embedded or alternatively tumor tissue was dissected, and snap-frozen for western analysis. All animal experiments were in accordance with approved animal protocol by Duke's IACUC (A239-10-9).

#### **Immunohistochemistry**

Immunohistochemistry on mouse and human formalin-fixed, paraffin-embedded sections was performed using Discovery XT (Ventana Medical Systems). H3K27me3 antibody (cell signaling) dilution was 1:200. Quantification of staining was done with Metamorph.



Human DIPG tissue was obtained from Memorial Sloan-Kettering Cancer Center, New York University Medical Center (Drs. Karajannis and Zagzag), Children's Memorial hospital (Dr. Fangusaro), University of Colorado (Dr. Foreman) and was IRB approved at the respective institutions.

### **Peptide crosslinking**

1 $\mu$ g of purified PRC2 was incubated with 2 $\mu$ g of photoMet or benzophenone biotinylated peptide in crosslinking buffer (Final volume 30 $\mu$ L) in opaque 1.5mL microfuge tubes. A 6W handheld UV crosslinking was placed directly onto tubes and used to irradiate the sample with long wavelength UV light for 5 or 10 minutes on ice. Samples were resolved by SDS-PAGE and transferred to nitrocellulose followed by Streptavidin-HRP incubation.

### **Peptide pulldown assays**

40 $\mu$ L of high capacity Streptavidin-Sepharose beads containing saturating amounts of biotinylated H3 18-27 peptides (unmodified, K27M, K27ac, K27me3) were added to 1mL of clarified concentrated HeLa nuclear extract (8.7mg/mL). Following a 4-hour incubation at 4C, the beads were collected and washed three times in 1mL of buffer (20mM HEPES 7.9, 50mM KCl, 1mM EDTA, 0.01% NP-40, 2mM 2-mercaptoethanol, 0.4mM PMSF). Bound protein was eluted with 1x SDS loading buffer. Highly purified GST-EED (WD domain) or GST-CBX7 (chromodomain) (10 $\mu$ g) was added to the 40 $\mu$ L of peptide bound Streptavidin-Sepharose beads. Incubation, wash and elution conditions were followed as described.

### **Biacore measurements**

Saturating amounts of 3 peptides (18-37 unmodified, K27me3, or K27M) were immobilized on SA Biacore chip (GE Healthcare). Purified recombinant GST fusion protein containing the WD-domain of human EED dialyzed in 1xPBS was used for all measurements.

Interaction measurements were taken in triplicate with GST-EED concentrations of 0.2 $\mu$ M, 2 $\mu$ M, 10 $\mu$ M, 20 $\mu$ M and 200 $\mu$ M in 1xPBS. Kinetic and affinity constants were determined using BIAevaluation software.

## Peptide Synthesis

Peptides were synthesized on a Rink amide-MBHA resin using 2-(1H-benzotriazole-1-yl)-1,1,3,3-tetramethyluronium hexafluorophosphate (HBTU) activation of N<sup>α</sup>-Fmoc protected amino acids. For photo-crosslinker peptides, a C-terminal N<sup>α</sup>-Fmoc-Lys(N<sup>ε</sup>-alloc) residue allowed for biotin incorporation upon selective alloc removal from a 4-mer peptide intermediate by treatment with Pd(0). Fmoc-photo-L-Methionine (synthesized from L-photo-Methionine (Pierce) as published previously (Vila-Perelló et al. JACS, **129** 8068)) and Fmoc-4-benzoyl-L-phenylalanine (AdvancedChemTech) were coupled with 2-(1H-7-Azabenzotriazole-1-yl)-1,1,3,3-tetramethyluronium hexafluorophosphate (HATU) for the synthesis of peptides **1** and **2**, respectively. Peptide N-termini were acetylated using acetic anhydride. The resulting peptides were cleaved with TFA containing 5% triisopropylsilane (TIS) for one hour at RT, precipitated with ether and purified by preparative reverse-phase HPLC (RP-HPLC) on a C-18 column with a 5-35% B gradient (Solvent B: 90% acetonitrile, 10% H<sub>2</sub>O, 0.1% trifluoroacetic acid; Solvent A: H<sub>2</sub>O containing 0.1% trifluoroacetic acid). Purity of the final product was assessed by C-18 RP-HPLC using a 0-30% B (benzophenone-containing peptide **2**) or 0-40% (photo-Met containing peptide **1**) gradient. Peptide identity was confirmed by electrospray ionization mass spectrometry (ESI-MS; **1** calculated: 1536.80 Da, observed: 1536.83 Da; **2** calculated M+H<sup>+</sup>: 1692.83 Da, observed: 1692.85 Da).

Selective biotinylation of the K27nle peptide **3** at its C-terminal lysine residue was achieved upon orthogonal MTT removal by 1% TFA in CH<sub>2</sub>Cl<sub>2</sub> in the full-length, N-terminally acetylated peptide before cleavage. Peptide **3** was cleaved from the resin by incubation with 95% TFA containing 2.5% TIS and 2.5% H<sub>2</sub>O for 1.5 hours at RT. Purification by preparative reverse-phase HPLC (RP-HPLC) on a C-18 column with a X-XX% B gradient yielded pure peptide (calculated M+H<sup>+</sup>: 2571.5 Da, observed: 2571.5 Da).

## **SUPPLEMENTAL FIGURE LEGENDS**

**Fig. S1** Generation of H3K27M-specific antisera. **(A)** Shown are immunoblots of whole cell extract from the indicated transgenic 293T cell lines. The H3K27M-specific antisera was generated in collaboration with EMD Millipore (Temecula, CA). The H3K27M rabbit antiserum was used at a concentration of 1:1000. **(B)** Immunoblot of acid extracted histones from four different human DIPG samples with the anti-K27M antibody. Fraction of H3.3K27M to the total amount of histone H3 in human DIPG samples as measured by quantitative mass spectrometry. **(C)** Proliferating ectopic cell clusters but no tumor formation with K27M H3.3 expression + p53 loss in the postnatal murine brainstem. Representative high magnification (40X) double immunofluorescence for HA (H3.3 K27M) and PCNA demonstrating an ectopic cell cluster containing K27M-positive cells and PCNA-positive cells. **(D)** Representative high magnification (40X) double immunofluorescence for HA (H3.3 WT) and PCNA demonstrating the absence of PCNA-positive cells around H3.3-WT-positive cells.

**Fig. S2** PRC2 components remain unchanged in H3.3K27M transgenic PDGF-driven murine glioblastoma cell line **(A)**. Shown are immunoblots with antisera specific to PRC2-associated proteins AEBP2 and Jarid2, and core PRC2 subunits, EED, EZH2 and SUZ12. **(B)** Chromatin containing endogenous, wildtype H3 exhibits reduced H3K27me3 or H3K9me3 levels. 293T cells were transduced with lentiviruses expressing H3.2-HA-FLAG and untagged H3.3 K9M, K9R, K27M, or K27R. Immunoprecipitated oligonucleosomes (anti-FLAG) were immunoblotted for H3K9me3, H3K27me3 or general H3. **(C)** H3.3 G34R/V mutations decrease H3K36me2/3 levels. Quantitative mass-spectrometry of H3K36me3 levels on immunoprecipitated transgenic H3.3 proteins from purified heterotypic mononucleosomes. **(D)** Purified human GST-SET2 (aa 1410-1714) from E.coli. **(E)** Reduced hSET2 activity on heterotypic G34R/V mononucleosomes. Recombinant human SET2 (200ng) or PRC2 (50ng) were used for methyltransferase assays on wildtype H3.3 or heterotypic G34R or G34V mononucleosomes.

**Fig. S3** Purified components for *in vitro* PRC2 histone methyltransferase assays. **(A)** Silver stain of peak PRC2 and EED-Y365A complex Mono Q fraction. PRC2 was purified using both affinity and conventional chromatography from a HeLa cell line that expresses epitope-tagged EED. **(B)** Coomassie stained gel of purified mono- or oligonucleosomes from epitope-tagged 293T cells. **(C)** Heterotypic H3.3K27M heterotypic mononucleosomes or H3.3K27M-containing oligonucleosomes are poor substrates for PRC2 methyltransferase activity. Fluorography of PRC2-mediated methylation of wildtype H3.3 or H3.3K27M nucleosome substrates. **(D,E)** Titration of increasing concentration of K27M or K27ac peptide, while simultaneously decreasing the concentration of K27me3 peptide. We observed a modest decrease in PRC2 activity at a K27M:K27me3 ratio of 1:2.3 that steadily grew with an increased ratio of K27M to K27me3 peptide. In contrast, no decrease in PRC2 activity was observed at a 9:1 ratio of K27ac: K27me3 peptide.

**Fig. S4** Probing interaction between K27M and PRC2 components. **(A)** No observable interaction between PRC2 and K27M in peptide pulldown assay from HeLa cell nuclear extract. EZH2 and SUZ12 immunoblot of eluate from peptide pulldowns using the indicated peptides. **(B)** No observable interaction between GST-EED and K27M in peptide pulldown assay. Coomassie stained gel of eluate from pulldowns between GST-EED and the indicated peptides. **(C)** No observable interaction between PRC1 component CBX7 and K27M in peptide pulldown. Coomassie gel of eluate from pulldowns between GST-CBX7 and the indicated peptides. **(D)** No observable interaction between EED and K27M peptide by Biacore (SPR). The H3K27me3 peptide interacted with EED with a measured  $K_d = 38 \pm 7.4 \mu\text{M}$ . **(E)** Benzophenone H3K27M peptide crosslinks EZH2. Coomassie gel of PRC2 complex (left), and streptavidin-HRP blot (right). **(F)** Structure of PhotoMet peptide **1** used in figure 4A. **(G)** Structure of benzophenone K27M peptide (**2**) used in Fig. 4SE.

**Fig. S5** PRC2 containing Y365A EED mutant is sensitive to K27M inhibition. **(A)** Purified PRC2 complexes (wildtype EED or Y365A EED) were incubated with either wildtype or K27M heterotypic mononucleosomes or oligonucleosomes. Shown are fluorography and coomassie gels of the reactions. **(B)** Interactions between the base of Histone H3 (31-42)

and SUZ12 was recently reported to allosterically stimulate PRC2 activity. K27M inhibits allosteric activation by H3.3 (31-42) peptide. Purified wildtype PRC2 was incubated with wildtype mononucleosomes and the indicated peptides at  $90\mu\text{M}$ . The H3K27M peptide was added at a concentration of  $45\mu\text{M}$ . Shown are fluorography and coomassie gels of the reactions.

**Fig. S6 (A)** Peptide structure of the H3K27Nle peptide **3** used in figure 4B. **(B)** Immunoblot for H3K27me3 of whole 293T cells transduced with H3.3, H3.3K27M, H3.3K27I or H3.3K27L. Anti-HA shows the relative amounts of the H3.3 transgenes. **(C)** Fluorography of methyltransferase reactions with PRC2 and wildtype H3.3 mononucleosomes in the presence of  $20\mu\text{M}$  or  $50\mu\text{M}$  H3 (18-37) peptide containing K27acetyl, K27Met, K27Nle, K27Ile or K27Leu. **(D)** Fluorography of PRC2 methyltransferase reactions with reconstituted nucleosomes containing recombinant human histones H3, H2B, H2A and H4. Reactions also contain  $100\mu\text{M}$  H3 peptides (18-37) containing K27acetyl, K27Ile, K27Met, K27Nle, or K27Leu. **(E)** Structural homology modeling of the human EZH2 active site using the web-based Phyre (BBSRC) program. The human SET8-H4K20 co-crystal structure was used for modeling (14). Active aromatic residues F724, Y726, Y641 and F667 are shown. A methionine was modeled in place of the H4K20 from the original SET8 co-crystal structure. Stick diagrams for L-leucine, L-isoleucine, L-methionine and L-norleucine are shown. **(F)** Coomassie gel of purified wildtype or Y641N-containing PRC2 from Hela cells transduced with FLAG-EZH2 or FLAG-EZH2-Y641N.

**Fig. S7** Inhibition of K9me2, K27me2 and K36me2 by K9M, K27M and K36M transgenes, respectively. **(A)** Shown are immunoblots of whole cell extract from lentiviral transduced 293T cells expressing the indicated H3.3 transgenes. **(B)** The K3K9M peptide does not inhibit PRC2-dependent nucleosome methylation. K9M or K27M peptides were added to PRC2 reactions with wildtype mononucleosomes at  $10\mu\text{M}$  or  $45\mu\text{M}$ . **(C)** Coomassie gels of GST-hSUV39H1 (aa 82-412) and GST-hG9a (aa 530-1210).  $\text{IC}_{50}$  measurement for SUV39H1 and G9a with the H3K9M (1-20) peptide ( $\text{IC}_{50}$  for K9M =  $2.2\mu\text{M}$  for SUV39H1 (95% CI: 1.7-2.6);  $\text{IC}_{50}$  for K9M =  $3.6\mu\text{M}$  (95% CI: 2.1-5.9) for G9a).

**Fig. S8** Chromatin context of the K-to-M H3 sequence is important for in vivo inhibition of trimethylation. The H3 tail (aa 1-42) was cloned onto the core domain (aa 23-102) of histone H4-HA-FLAG. The H3-H4 hybrid genes containing the K-to-M or K-to-R mutations were expressed in 293T cells. **(A)** Immunoblots of whole cell extract of H3.3 K9M, K9R and the K9M, K9R H3-H4 hybrid 293T cells. **(B)** Immunoblots of whole cell extract of H3.3 K27M, K27R and the K27M, K27R H3-H4 hybrid 293T cells. **(C)** Immunoblots of whole cell extract of H3.3 K36M, K36R and the K36M, K36R H3-H4 hybrid 293T cells. **(D)** H3K9me3 levels were reduced in cells expressing the K9M H3-H4 hybrid. However, little reduction in H3K27me3 or H3K36me3 levels was observed with the hybrid H3-H4 transgenes **(B,C)**. To determine if the position of the K-to-M mutation on the N-terminal tail of the hybrid H3-H4 protein, we constructed a second set of hybrid transgenes. The first 14 residues of the H3 tail were replaced by 14 amino acids surrounding the K27 or K36 (H3-H4-K36 (K9) or H3-H4-K27 (K9)) **(D)**. The K-to-M mutations in these hybrids also failed to reduce K27me3 or K36me3 levels **(B,C)**. These results suggest that the position of the K-to-M H3 tail on the nucleosome is critical for full inhibition activity.

**Figure S1**

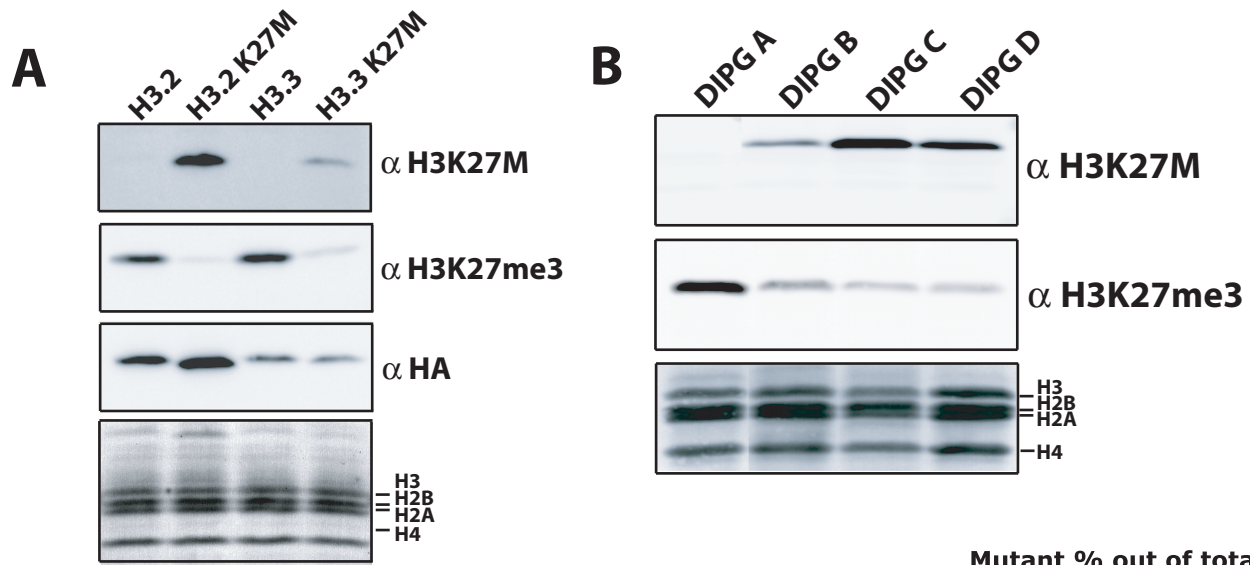

| Sample | Genotype  | Mutant % out of total H3 |       |
|--------|-----------|--------------------------|-------|
|        |           | Average                  | STDEV |
| DIPG A | wt        | -                        | -     |
| DIPG B | K27M H3.1 | 3.63%                    | 0.33% |
| DIPG C | K27M H3.3 | 17.61%                   | 1.11% |
| DIPG D | K27M H3.3 | 6.24%                    | 1.24% |

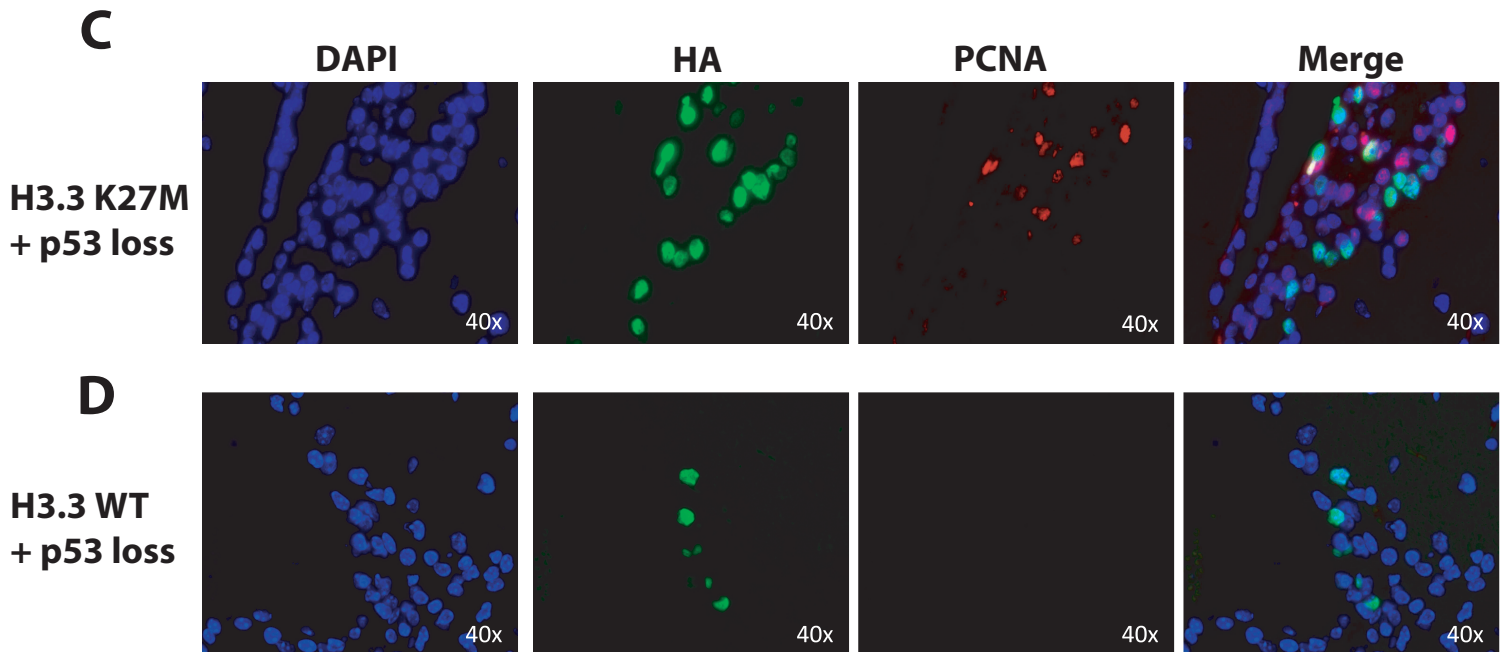

**Figure S2**

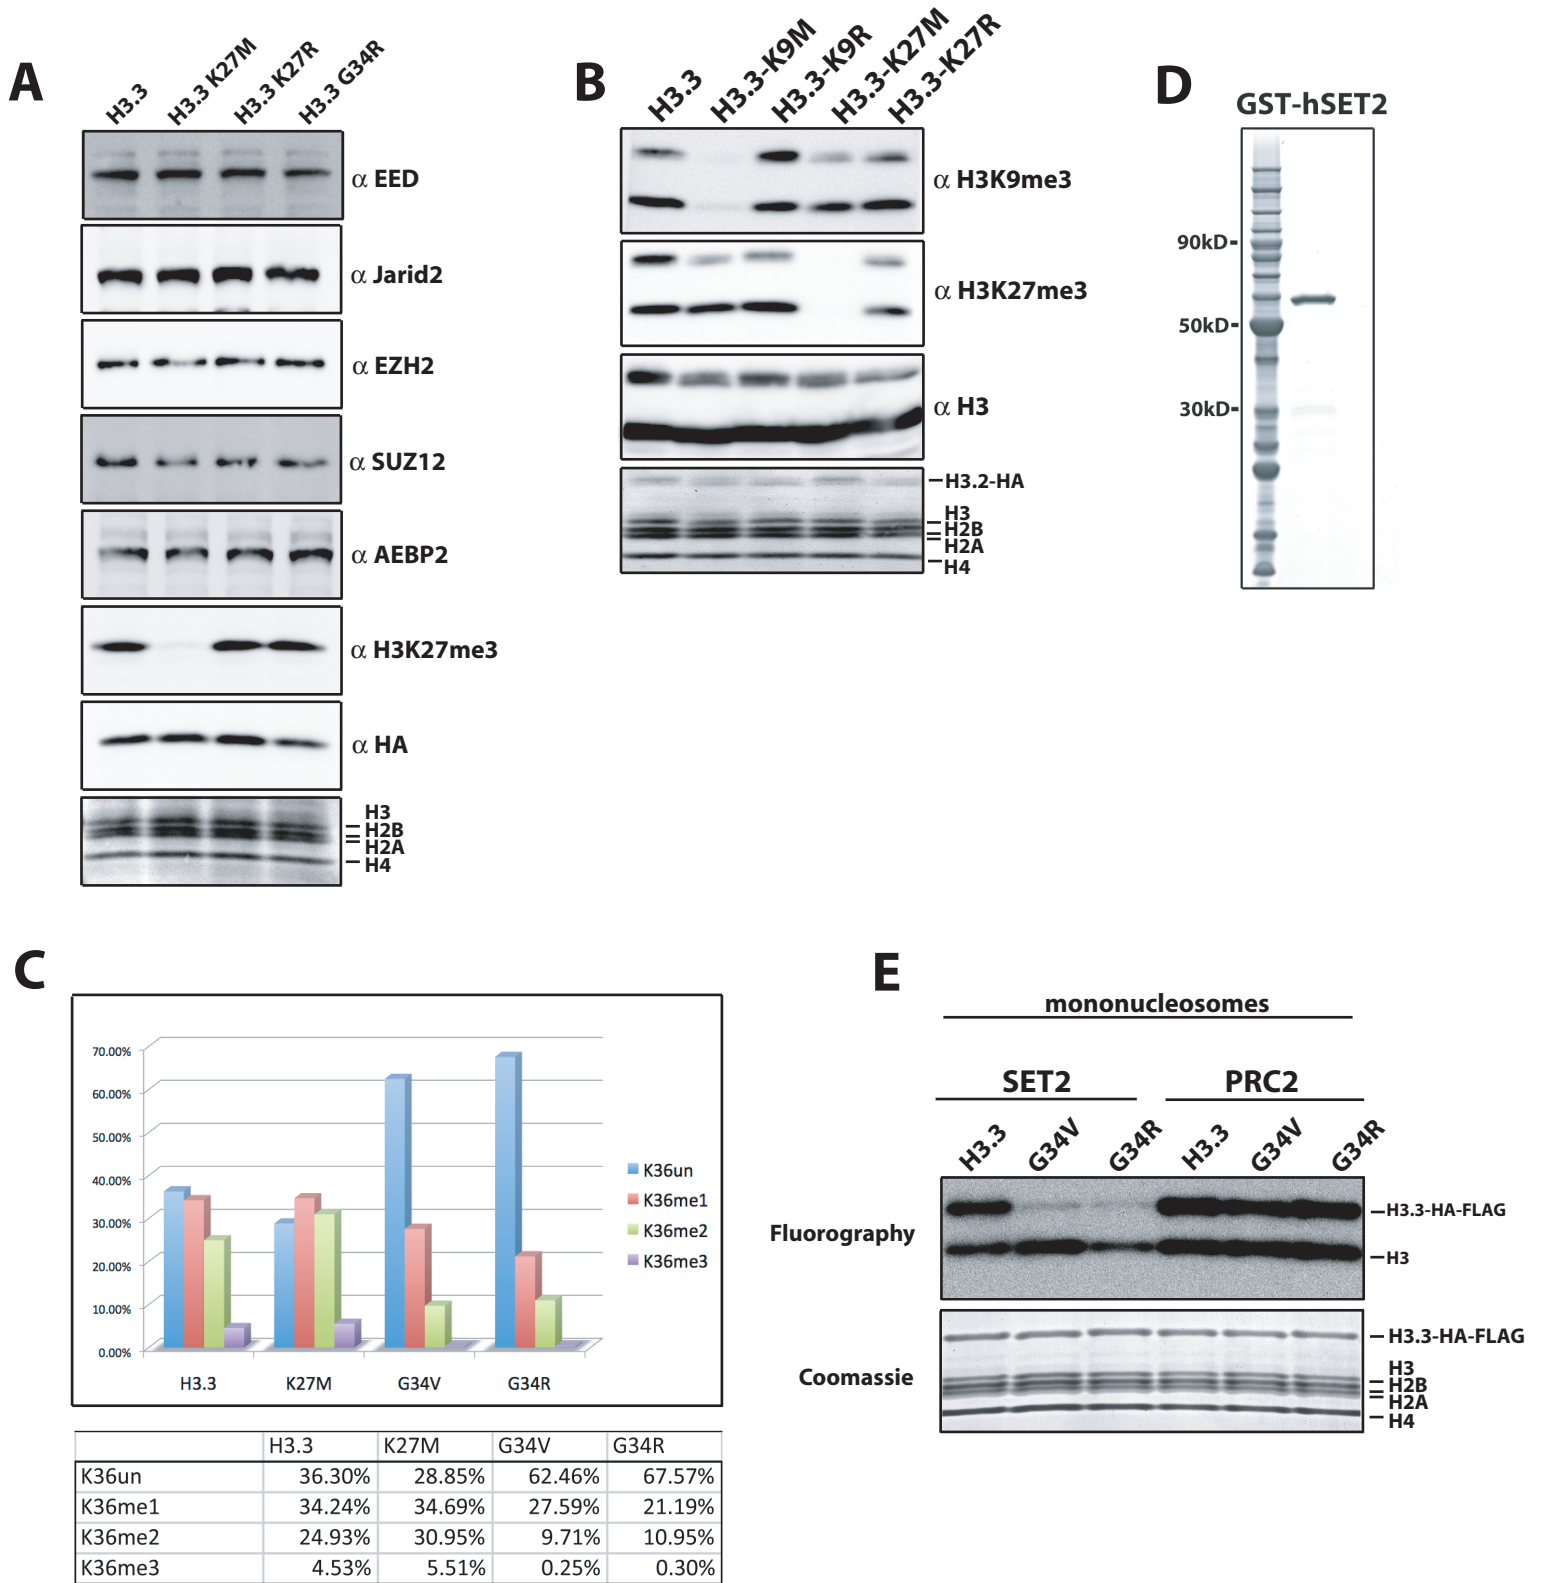



**Figure S3**

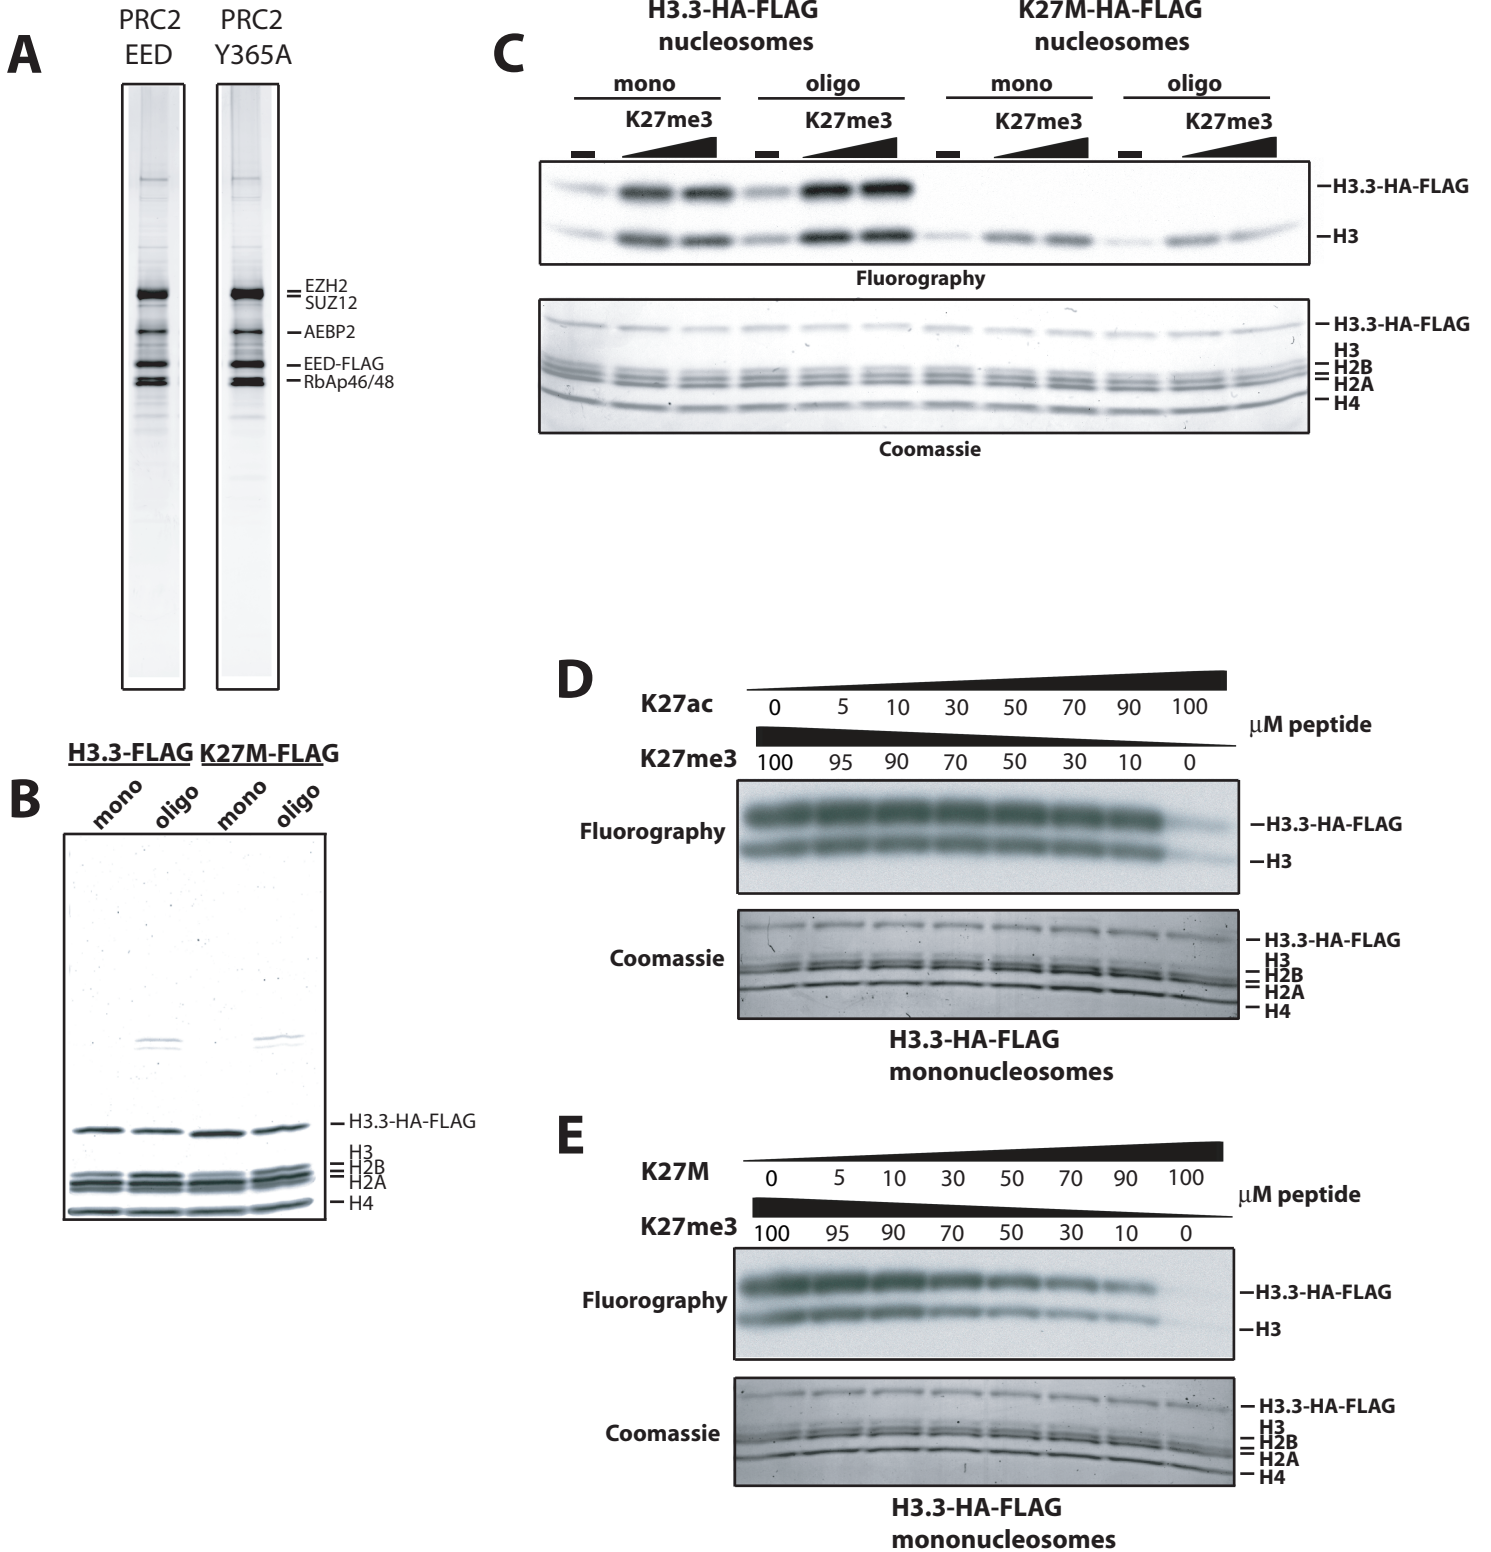

**Figure S4**

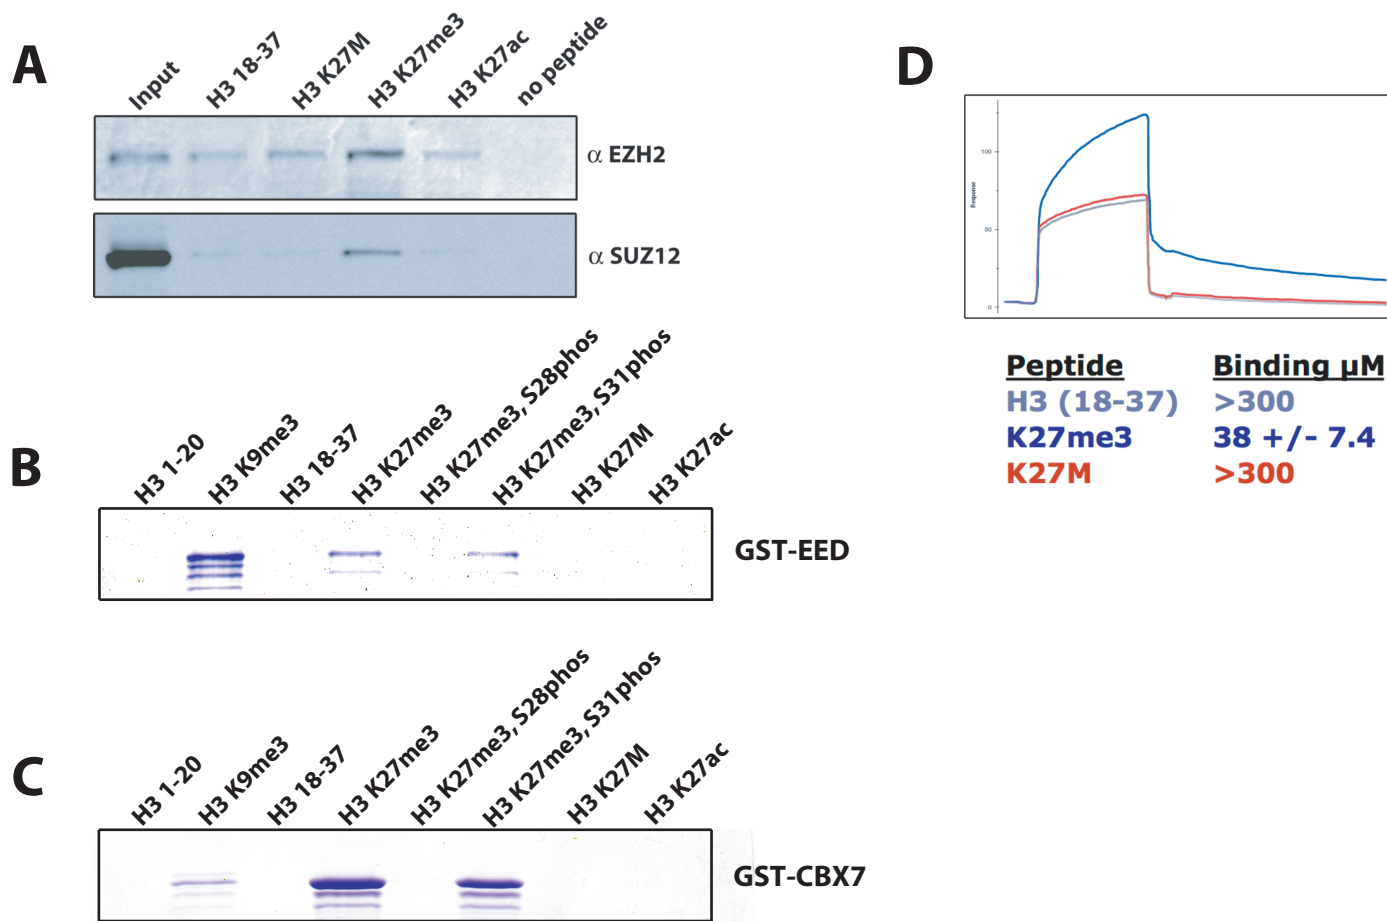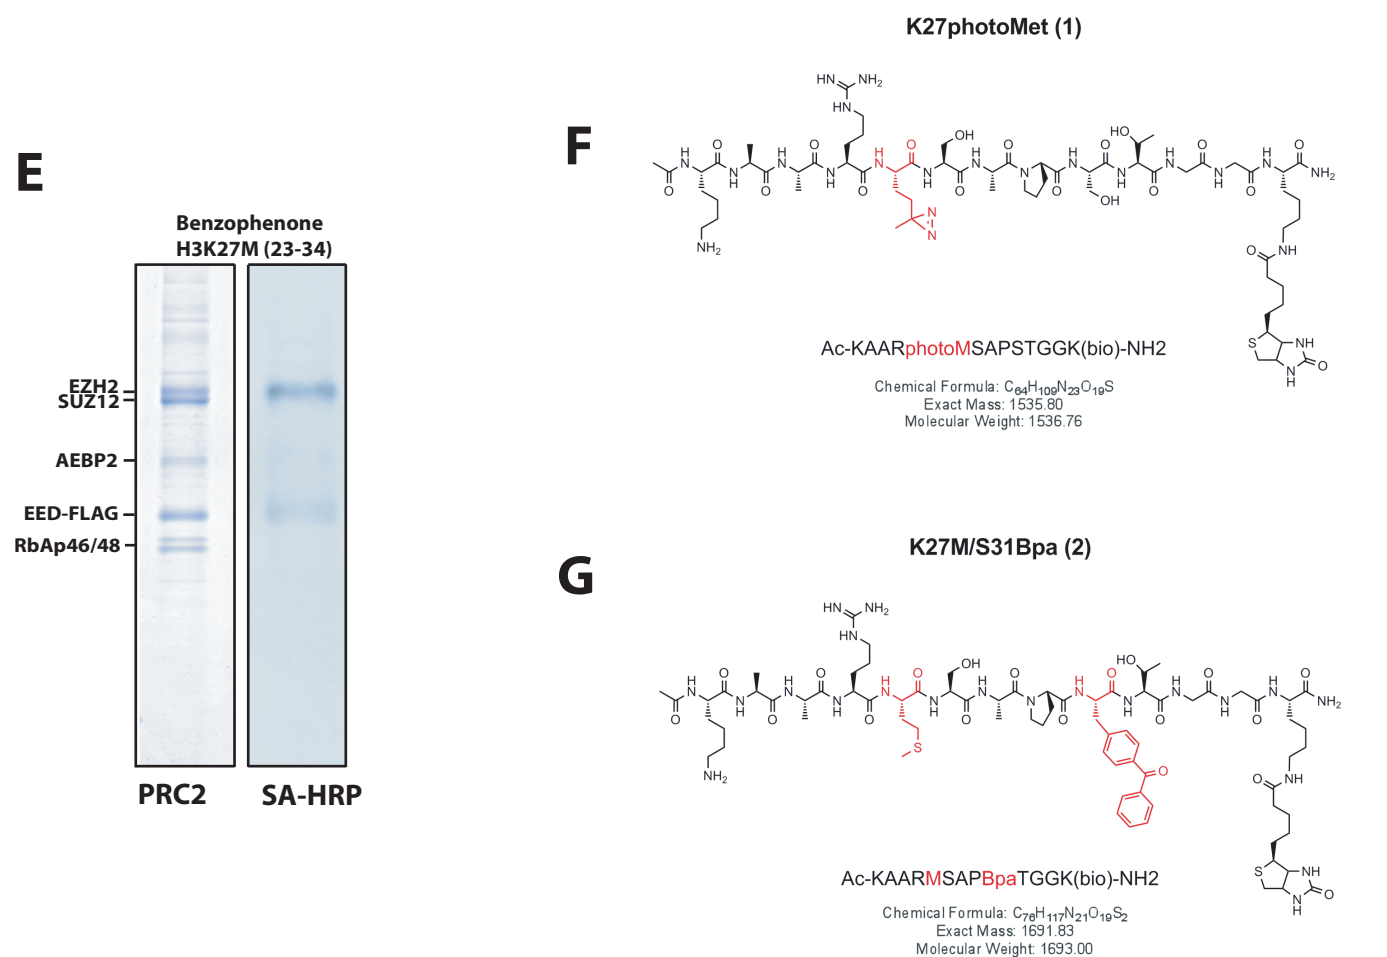

Figure S5

**A**

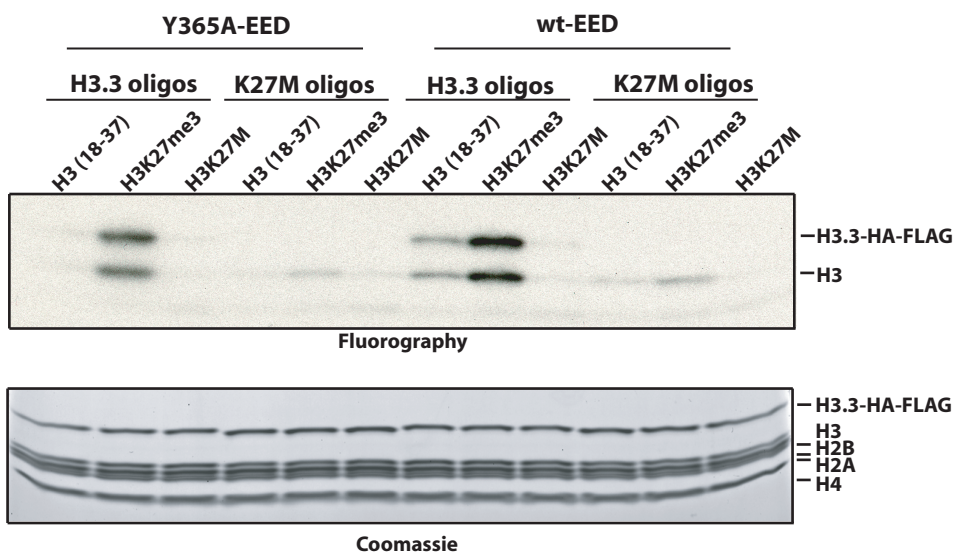

**B**

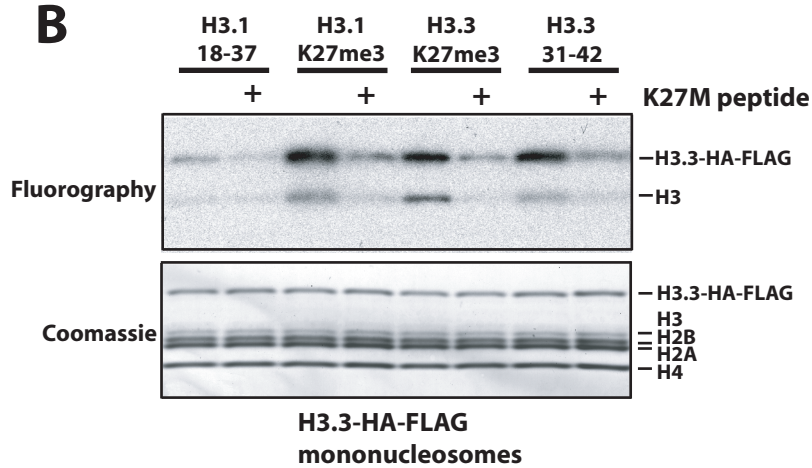

**Figure S6**

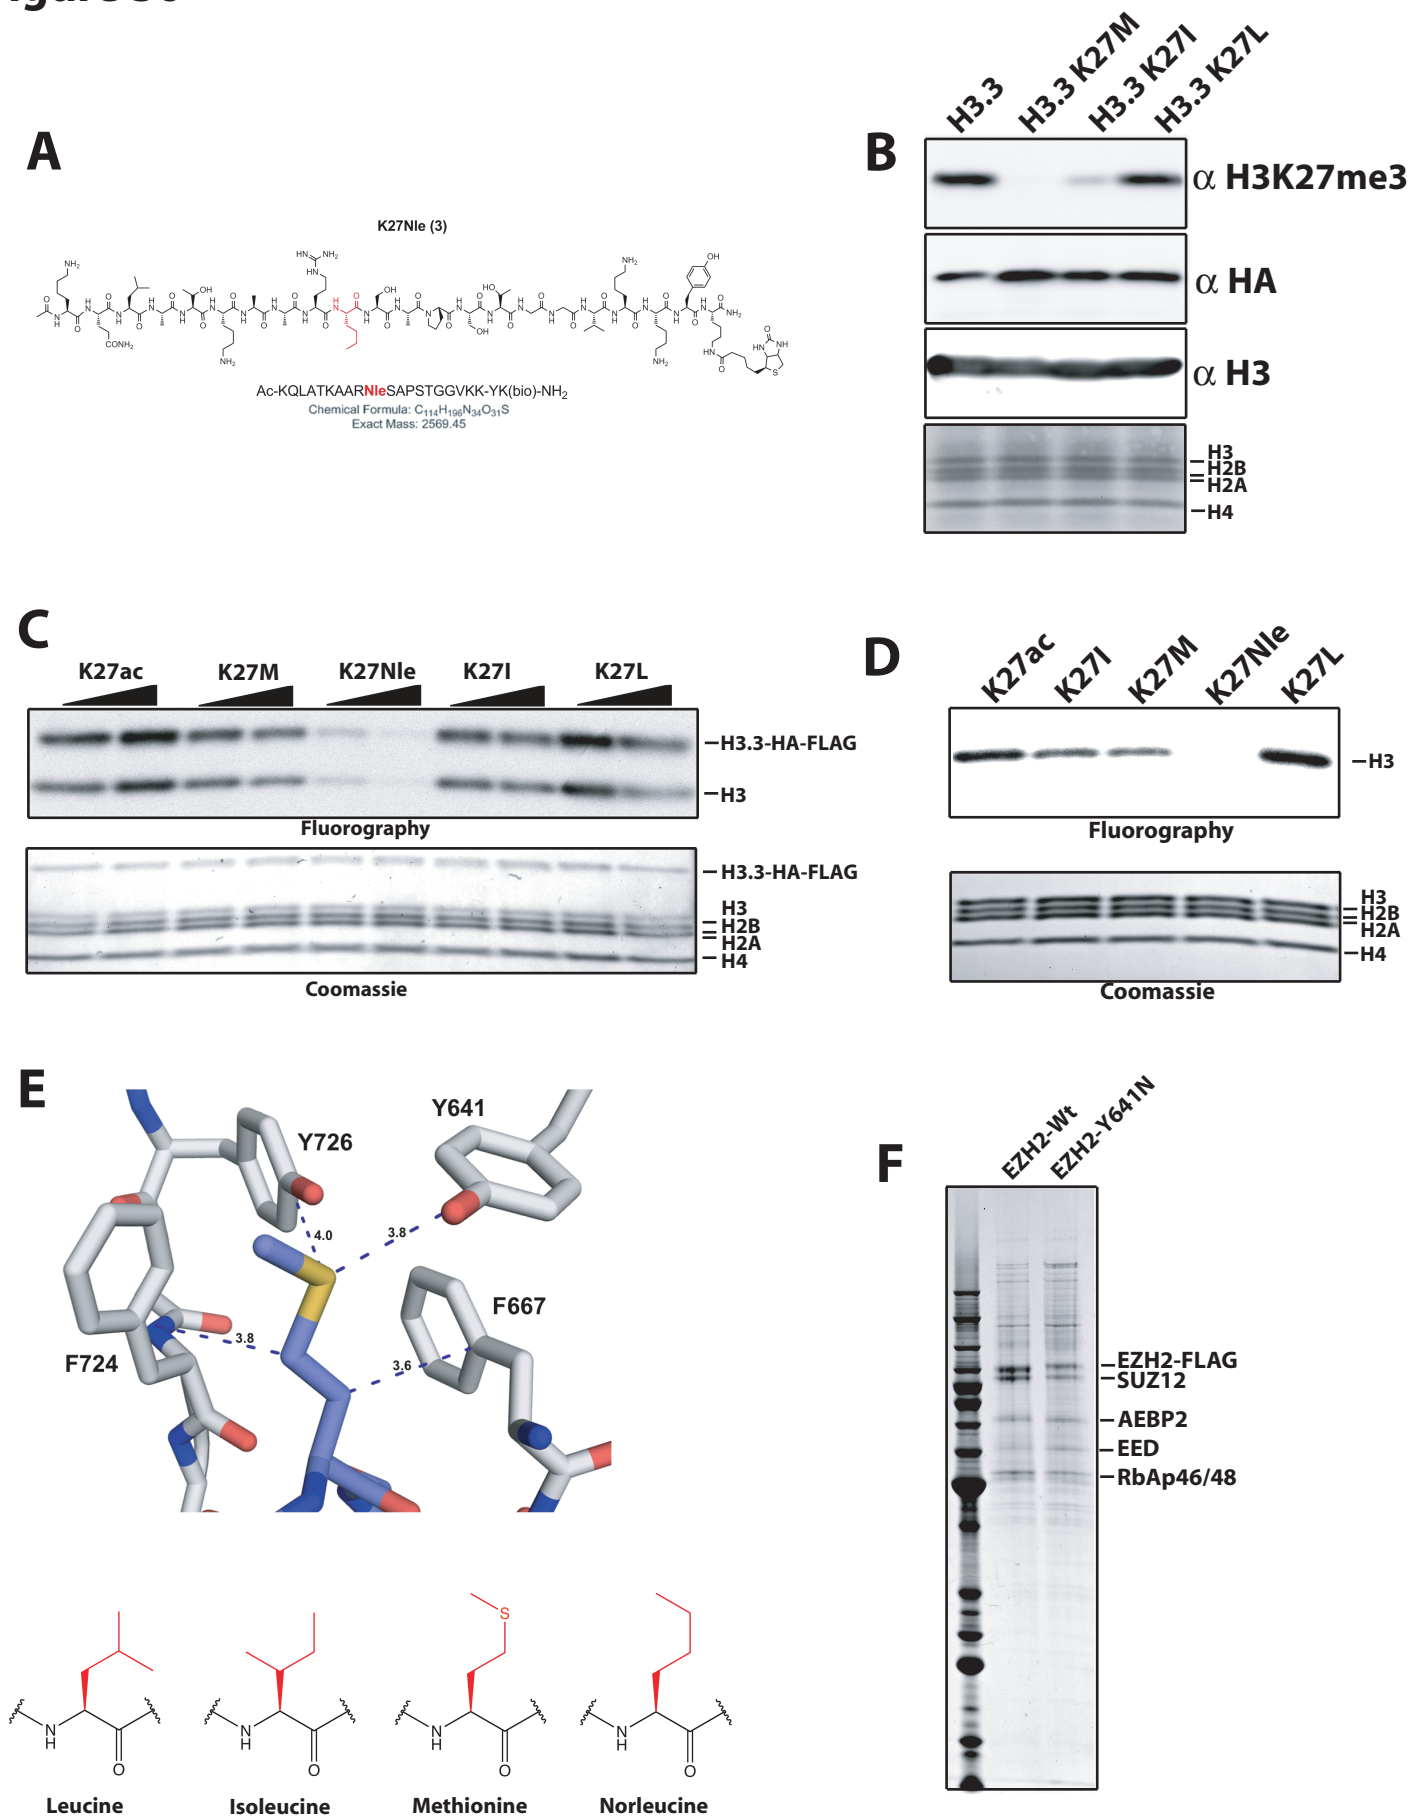

**Figure S7**

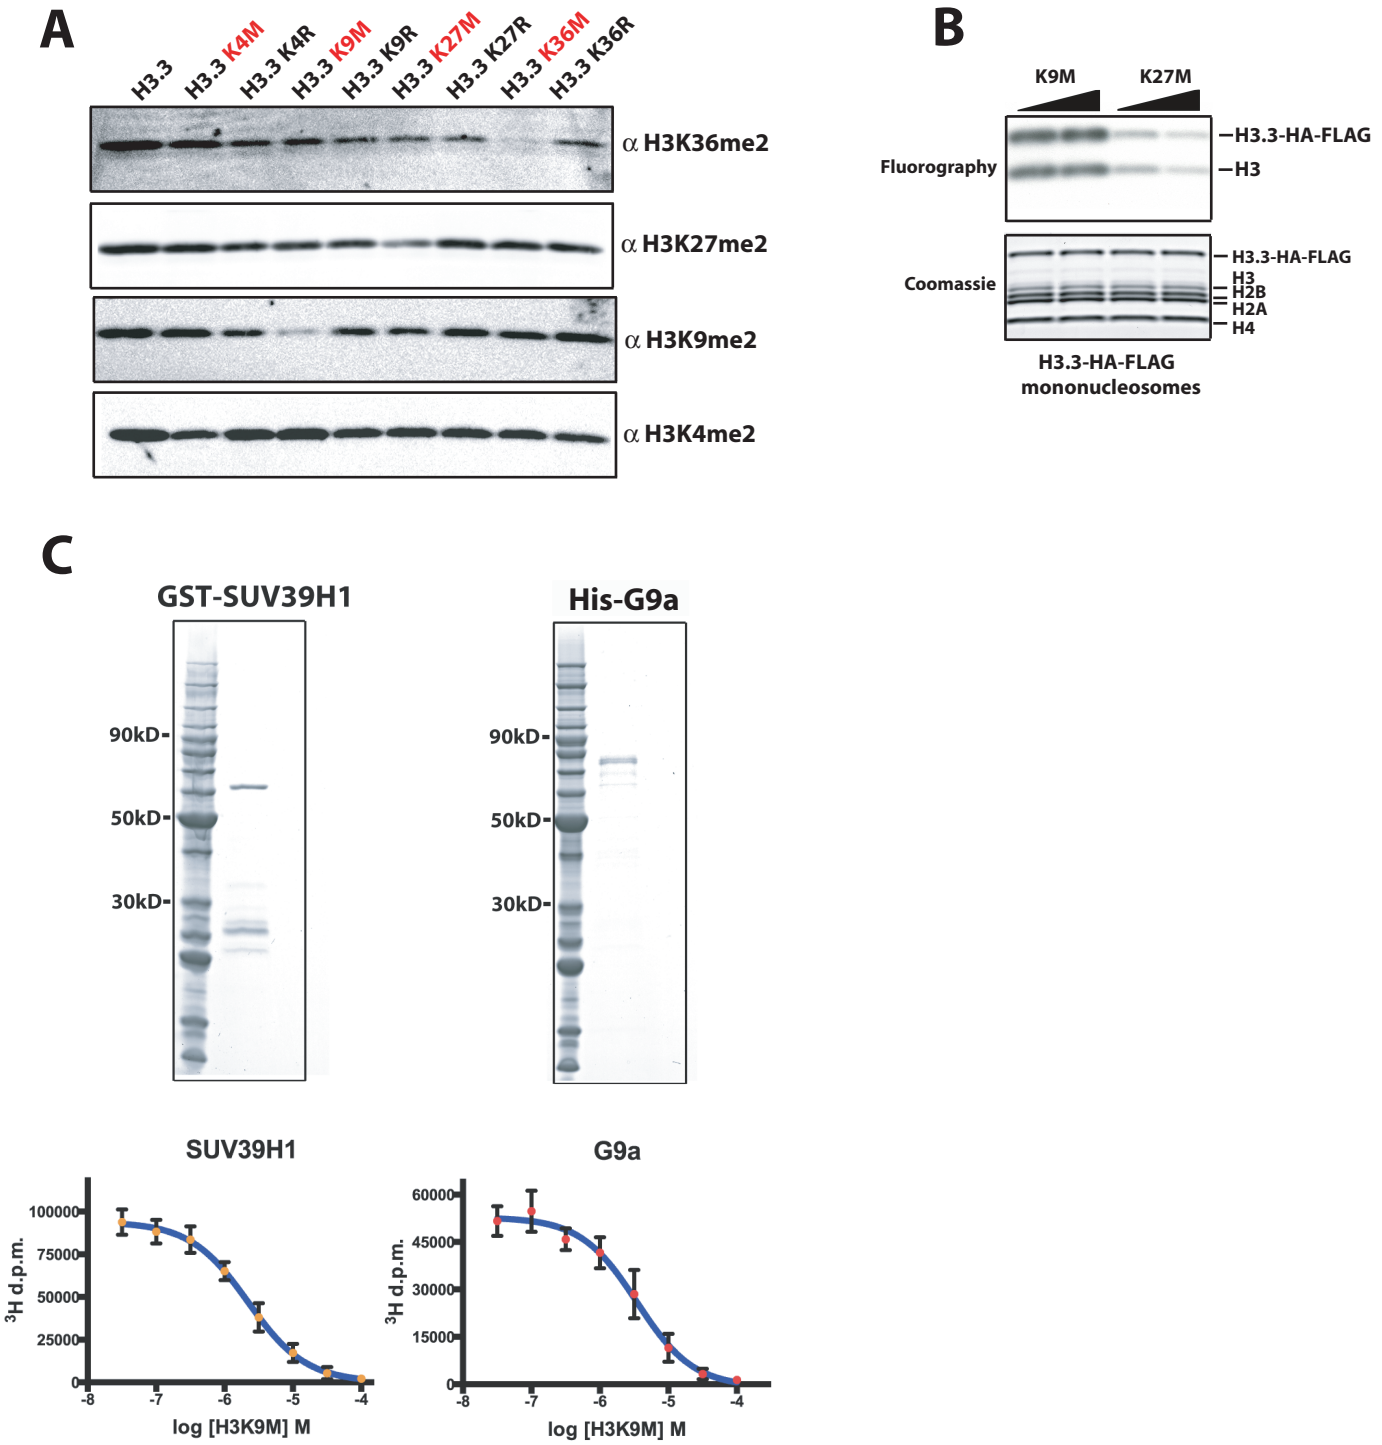



**Figure S8**

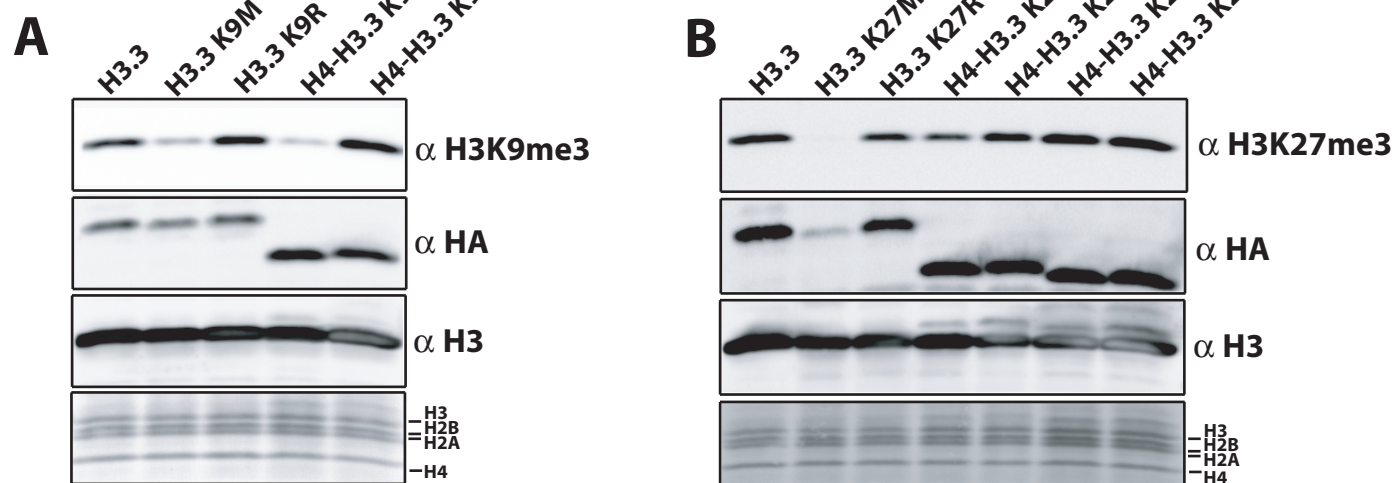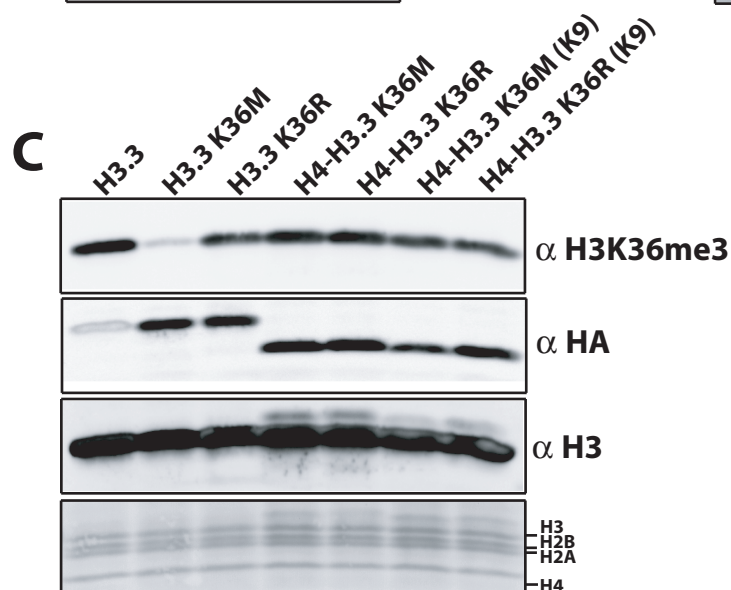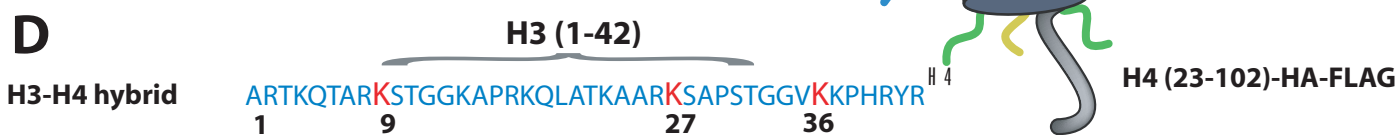

**Trimethylation Inhibition**

|                 |                                                                                          |     |
|-----------------|------------------------------------------------------------------------------------------|-----|
| H3-H4-K9R       | ARTKQTAR <b>R</b> STGGKAPRKQLATKAAR <b>K</b> SAPSTGGV <b>K</b> KPHRYR                    | -   |
| H3-H4-K9M       | ARTKQTAR <b>M</b> STGGKAPRKQLATKAAR <b>K</b> SAPSTGGV <b>K</b> KPHRYR                    | +++ |
| H3-H4-K27R      | ARTKQTAR <b>K</b> STGGKAPRKQLATKAAR <b>R</b> SAPSTGGV <b>K</b> KPHRYR                    | -   |
| H3-H4-K27M      | ARTKQTAR <b>K</b> STGGKAPRKQLATKAAR <b>M</b> SAPSTGGV <b>K</b> KPHRYR                    | +   |
| H3-H4-K36R      | ARTKQTAR <b>K</b> STGGKAPRKQLATKAAR <b>K</b> SAPSTGGV <b>R</b> KPHRYR                    | -   |
| H3-H4-K36M      | ARTKQTAR <b>K</b> STGGKAPRKQLATKAAR <b>K</b> SAPSTGGV <b>M</b> KPHRYR                    | -   |
| H3-H4-K36 (K9)  | AR <b>P</b> STGGV <b>K</b> KPHRYR <b>R</b> PRKQLATKAAR <b>K</b> SAPSTGGV <b>K</b> KPHRYR | -   |
| H3-H4-K36R (K9) | AR <b>P</b> STGGV <b>R</b> KPHRYR <b>R</b> PRKQLATKAAR <b>K</b> SAPSTGGV <b>K</b> KPHRYR | -   |
| H3-H4-K36M (K9) | AR <b>P</b> STGGV <b>M</b> KPHRYR <b>R</b> PRKQLATKAAR <b>K</b> SAPSTGGV <b>K</b> KPHRYR | -   |
| H3-H4-K27 (K9)  | ARATKAAR <b>K</b> SAPSGGK <b>P</b> RKQLATKAAR <b>K</b> SAPSTGGV <b>K</b> KPHRYR          | -   |
| H3-H4-K27R (K9) | ARATKAAR <b>R</b> SAPSGGK <b>P</b> RKQLATKAAR <b>K</b> SAPSTGGV <b>K</b> KPHRYR          | -   |
| H3-H4-K27M (K9) | ARATKAAR <b>M</b> SAPSGGK <b>P</b> RKQLATKAAR <b>K</b> SAPSTGGV <b>K</b> KPHRYR          | -   |

## References

1. S. J. Elsässer, C. D. Allis, P. W. Lewis, New epigenetic drivers of cancers. *Science* **331**, 1145 (2011). [doi:10.1126/science.1203280](https://doi.org/10.1126/science.1203280) [Medline](#)
2. J. A. Simon, C. A. Lange, Roles of the EZH2 histone methyltransferase in cancer epigenetics. *Mutat. Res.* **647**, 21 (2008). [doi:10.1016/j.mrfmmm.2008.07.010](https://doi.org/10.1016/j.mrfmmm.2008.07.010) [Medline](#)
3. R. Margueron, D. Reinberg, The Polycomb complex PRC2 and its mark in life. *Nature* **469**, 343 (2011). [doi:10.1038/nature09784](https://doi.org/10.1038/nature09784) [Medline](#)
4. D. A. Khuong-Quang *et al.*, K27M mutation in histone H3.3 defines clinically and biologically distinct subgroups of pediatric diffuse intrinsic pontine gliomas. *Acta Neuropathol.* **124**, 439 (2012). [doi:10.1007/s00401-012-0998-0](https://doi.org/10.1007/s00401-012-0998-0) [Medline](#)
5. J. Schwartzenuber *et al.*, Driver mutations in histone H3.3 and chromatin remodelling genes in paediatric glioblastoma. *Nature* **482**, 226 (2012). [doi:10.1038/nature10833](https://doi.org/10.1038/nature10833) [Medline](#)
6. G. Wu *et al.*; St. Jude Children's Research Hospital–Washington University Pediatric Cancer Genome Project, Somatic histone H3 alterations in pediatric diffuse intrinsic pontine gliomas and non-brainstem glioblastomas. *Nat. Genet.* **44**, 251 (2012). [doi:10.1038/ng.1102](https://doi.org/10.1038/ng.1102) [Medline](#)
7. O. J. Becher *et al.*, Preclinical evaluation of radiation and perifosine in a genetically and histologically accurate model of brainstem glioma. *Cancer Res.* **70**, 2548 (2010). [doi:10.1158/0008-5472.CAN-09-2503](https://doi.org/10.1158/0008-5472.CAN-09-2503) [Medline](#)
8. R. Margueron *et al.*, Role of the polycomb protein EED in the propagation of repressive histone marks. *Nature* **461**, 762 (2009). [doi:10.1038/nature08398](https://doi.org/10.1038/nature08398) [Medline](#)
9. C. Xu *et al.*, Binding of different histone marks differentially regulates the activity and specificity of polycomb repressive complex 2 (PRC2). *Proc. Natl. Acad. Sci. U.S.A.* **107**, 19266 (2010). [doi:10.1073/pnas.1008937107](https://doi.org/10.1073/pnas.1008937107) [Medline](#)
10. D. B. Yap *et al.*, Somatic mutations at EZH2 Y641 act dominantly through a mechanism of selectively altered PRC2 catalytic activity, to increase H3K27 trimethylation. *Blood* **117**, 2451 (2011). [doi:10.1182/blood-2010-11-321208](https://doi.org/10.1182/blood-2010-11-321208) [Medline](#)
11. C. J. Sneeringer *et al.*, Coordinated activities of wild-type plus mutant EZH2 drive tumor-associated hypertrimethylation of lysine 27 on histone H3 (H3K27) in human B-cell lymphomas. *Proc. Natl. Acad. Sci. U.S.A.* **107**, 20980 (2010). [doi:10.1073/pnas.1012525107](https://doi.org/10.1073/pnas.1012525107) [Medline](#)
12. S. D. Taverna, H. Li, A. J. Ruthenburg, C. D. Allis, D. J. Patel, How chromatin-binding modules interpret histone modifications: Lessons from professional pocket pickers. *Nat. Struct. Mol. Biol.* **14**, 1025 (2007). [doi:10.1038/nsmb1338](https://doi.org/10.1038/nsmb1338) [Medline](#)
13. A. Karytinis *et al.*, A novel mammalian flavin-dependent histone demethylase. *J. Biol. Chem.* **284**, 17775 (2009). [doi:10.1074/jbc.M109.003087](https://doi.org/10.1074/jbc.M109.003087) [Medline](#)
14. J. F. Couture, E. Collazo, J. S. Brunzelle, R. C. Trievel, Structural and functional analysis of SET8, a histone H4 Lys-20 methyltransferase. *Genes Dev.* **19**, 1455 (2005). [doi:10.1101/gad.1318405](https://doi.org/10.1101/gad.1318405) [Medline](#)
